# Supplementary material for: Genome-Wide Analysis of Four Pathotypes of Wheat Rust Pathogen (Puccinia graminis) Reveals Structural Variations and Diversifying Selection
Source: MDPI journal article supplement (doi:10.3390/jof7090701), 2021-08-27
Supplement: s1 [file s1]

# Genome wide analysis of four pathotypes of wheat rust pathogen (*Puccinia graminis*) reveals differences at structural variations and diversifying selection

Kanti Kiran<sup>1</sup>, Hukam C Rawal<sup>1</sup>, Himanshu Dubey<sup>1</sup>, Rajdeep Jaswal<sup>1</sup>, Subhash C Bhardwaj<sup>2</sup>, Rupesh Deshmukh<sup>3</sup> and Tilak Raj Sharma<sup>1,3</sup>

<sup>1</sup> ICAR-National Institute for plant Biotechnology, Pusa Campus New Delhi,

<sup>2</sup> ICAR-Indian Institute of Wheat and Barley Research, Regional Station, Flowerdale, Shimla,

<sup>3</sup> National Agri-Food Biotechnology Institute (NABI), Mohali, Punjab, India -160071

\* Correspondence: to: T R Sharma (trsharma1965@gmail.com; ddgcs.icar@nic.in), Phone:91- 11-23382545, FAX: 91-11-23097003

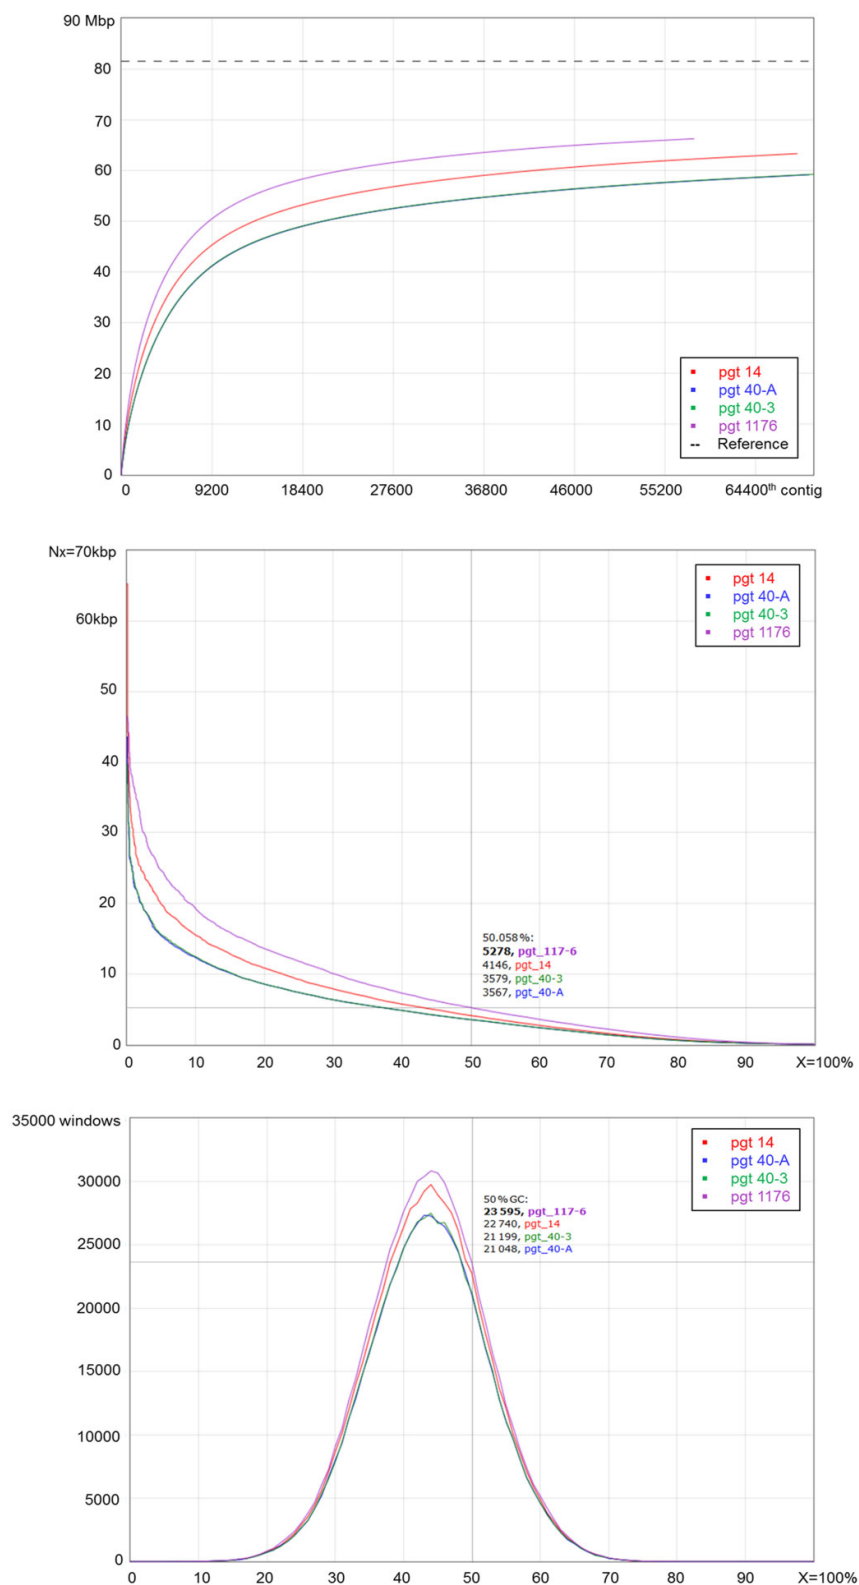

**Figure S1. Assembly statistics of *P. graminis* pathotypes.** Cumulative length of contig versus the genome size in all the four pathotypes (14, 40A, 40-3 and 117-6), post assembly, contigs are ordered from largest (contig #1) to smallest (**extreme top figure**). Presentation of N50 as a quality of assembly in the three pathotypes (**middle figure**). Whole genome presentations of GC% in the pathotypes, contigs are broken into nonoverlapping 100 bp windows. Plot shows numbers of

windows for each GC percentage (**bottom figure**). Reference used is from Broad Institute *P. graminis* isolate CDL 75-36-700-3, Race SCCL.

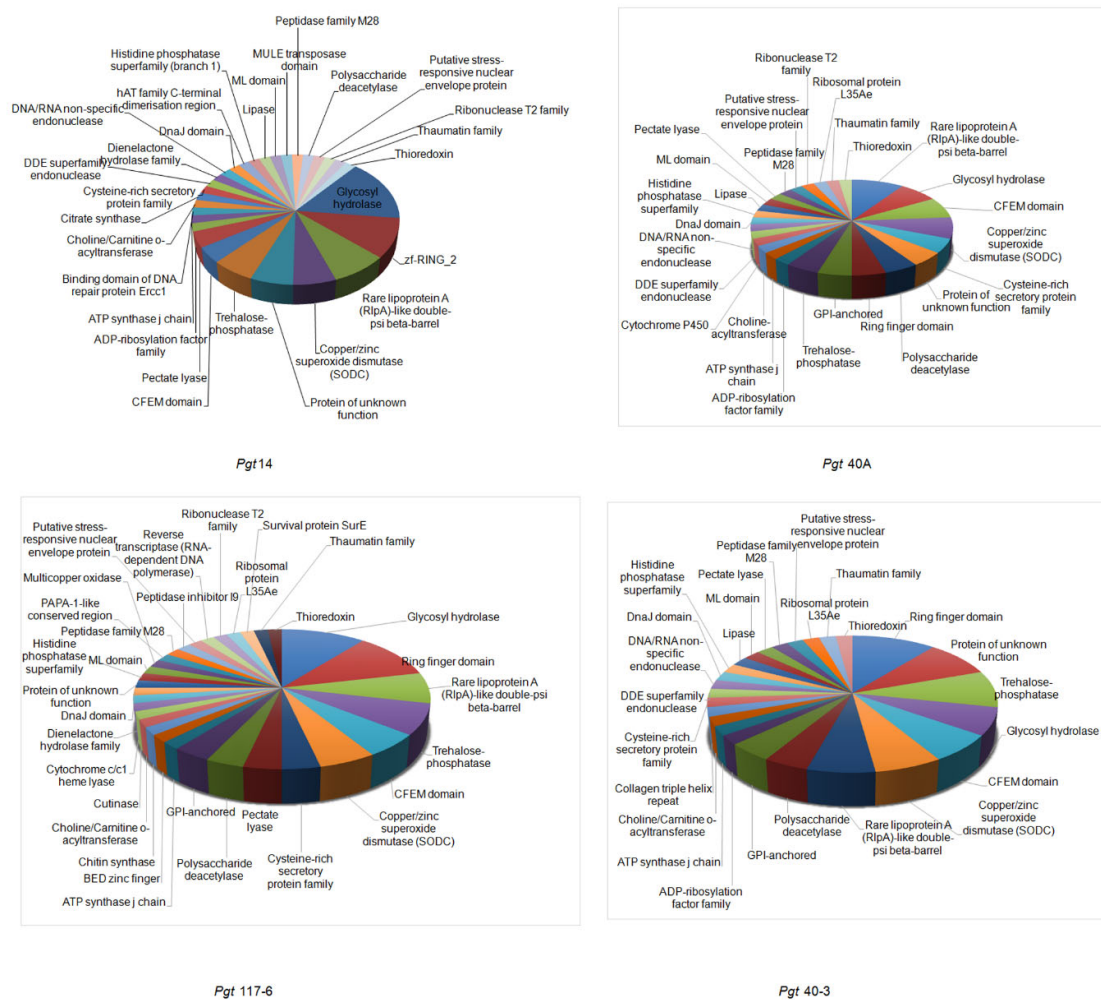

**Figure S2.** Identification of Conserved domains in the *P. graminis* pathotypes. Conserved domains within the extracellular secretory proteins identified in the four pathotypes by using Pfam database ([pfam.xfam.org/](http://pfam.xfam.org/)).

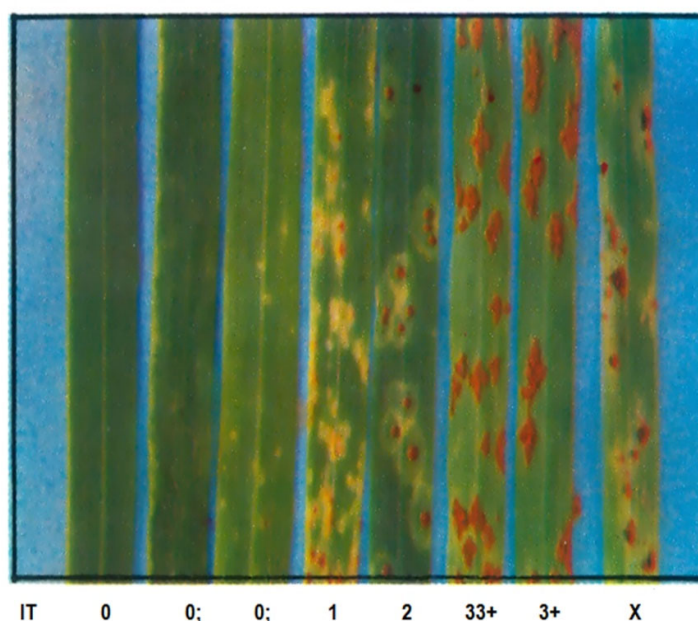

**Figure S3.** Depiction of IT (infection types) for the code of pathotypes on wheat leaves. Various degree of infection types ranging from 0-3+ achieved by *P. graminis* pathotypes on wheat leaves based on the severity achieved.

**Table S1.** Genome assembly of the *P. graminis* pathotypes.

| Statistics                      | <i>Pgt 14</i> | <i>Pgt 40-A</i> | <i>Pgt 40-3</i> | <i>Pgt 117-6</i> |
|---------------------------------|---------------|-----------------|-----------------|------------------|
| # contigs                       | 68622         | 69842           | 70264           | 58140            |
| # contigs ( $\geq 1000$ bp)     | 11917         | 11846           | 11883           | 11912            |
| # contigs ( $\geq 5000$ bp)     | 2991          | 2704            | 2702            | 3277             |
| # contigs ( $\geq 10000$ bp)    | 968           | 657             | 661             | 1263             |
| # contigs ( $\geq 25000$ bp)    | 42            | 16              | 14              | 98               |
| # contigs ( $\geq 50000$ bp)    | 1             | 0               | 0               | 0                |
| Largest contig                  | 65288         | 43631           | 39779           | 46544            |
| Total length                    | 63312312      | 59153492        | 59251903        | 66250748         |
| Total length ( $\geq 1000$ bp)  | 48572782      | 44344139        | 44461329        | 53780975         |
| Total length ( $\geq 5000$ bp)  | 28339086      | 23102244        | 23159474        | 34096505         |
| Total length ( $\geq 10000$ bp) | 14381309      | 9111835         | 9223794         | 20082964         |
| Total length ( $\geq 25000$ bp) | 1277225       | 468466          | 415994          | 3059556          |
| Total length ( $\geq 50000$ bp) | 65288         | 0               | 0               | 0                |
| N50                             | 4153          | 3573            | 3584            | 5288             |
| N75                             | 1132          | 997             | 1002            | 1620             |
| L50                             | 3720          | 4241            | 4233            | 3088             |
| L75                             | 10894         | 11868           | 11861           | 8686             |
| GC (%)                          | 43.61         | 43.65           | 43.65           | 43.59            |
| Misassemblies                   |               |                 |                 |                  |
| # misassemblies                 | 148           | 157             | 153             | 105              |
| # relocations                   | 3             | 5               | 4               | 3                |
| # translocations                | 145           | 152             | 148             | 102              |
| # inversions                    | 0             | 0               | 1               | 0                |
| # misassembled contigs          | 140           | 144             | 146             | 97               |
| Misassembled contigs length     | 62554         | 50078           | 51477           | 39373            |
| # local misassemblies           | 9             | 11              | 12              | 7                |
| # fully unaligned contigs       | 26412         | 30248           | 30233           | 17814            |
| Fully unaligned length          | 6701681       | 7597323         | 7599049         | 3829567          |

|                               |        |        |        |        |
|-------------------------------|--------|--------|--------|--------|
| # partially unaligned contigs | 4996   | 5730   | 5718   | 3532   |
| # with misassembly            | 58     | 61     | 64     | 32     |
| # both parts are significant  | 596    | 618    | 601    | 352    |
| Partially unaligned length    | 836969 | 798308 | 792713 | 430705 |
| Genome statistics             |        |        |        |        |
| Genome fraction (%)           | 68.12  | 61.919 | 62.054 | 75.834 |
| Duplication ratio             | 1.004  | 1.006  | 1.005  | 1.003  |
| Largest alignment             | 65288  | 43631  | 39766  | 46544  |
| NG50                          | 2245   | 1529   | 1537   | 3379   |

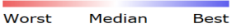
 Worst Median Best

\*Reference genomsize: 81521292 bp , G+C content: 43.35 %

**Table S2.** : Statistics of the completeness of the genome based on analysis by CEGMA.

A. with complete CEGs.

| <i>Pgt</i> Pathotypes | No. of proteins | % Completeness | Total | Average | % Ortho | Normalized % Completeness |
|-----------------------|-----------------|----------------|-------|---------|---------|---------------------------|
| 14                    | 193             | 77.82          | 364   | 1.89    | 54.92   | 86.54                     |
| 40A                   | 188             | 75.81          | 394   | 2.10    | 63.30   | 84.30                     |
| 40-3                  | 188             | 75.81          | 393   | 2.09    | 63.83   | 84.30                     |
| 117-6                 | 198             | 79.84          | 365   | 1.84    | 52.53   | 88.79                     |
| Reference             | 223             | 89.92          | 307   | 1.38    | 28.25   | 100                       |

B. with partial CEGs

| <i>Pgt</i> Pathotypes | No. of proteins | % Completeness | Total | Average | % Ortho | Normalized % Completeness |
|-----------------------|-----------------|----------------|-------|---------|---------|---------------------------|
| 14                    | 209             | 84.27          | 415   | 1.91    | 58.85   | 90.86                     |
| 40A                   | 205             | 82.66          | 446   | 2.18    | 64.88   | 89.13                     |
| 40-3                  | 205             | 82.66          | 436   | 2.13    | 63.90   | 89.13                     |
| 117-6                 | 212             | 85.48          | 400   | 1.89    | 53.77   | 92.17                     |
| Reference             | 230             | 92.74          | 343   | 1.49    | 34.78   | 100                       |

Key:

Prots = number of 248 ultra-conserved CEGs present in genome

%Completeness = percentage of 248 ultra-conserved CEGs present

Total = total number of CEGs present including putative orthologs

Average = average number of orthologs per CEG

%Ortho = percentage of detected CEGs that have more than 1 ortholog

**Table S3.** Identification of intra-pathotype genetic variation within the *P. graminis* pathotypes.

| Mapped Reads      | Reference         | Total SNPs | SNPs/Kb |
|-------------------|-------------------|------------|---------|
| <i>Pgt</i> -14    | <i>Pgt</i> -14    | 14,98,958  | 23.66   |
| <i>Pgt</i> -40A   | <i>Pgt</i> -40A   | 15,20,994  | 25.71   |
| <i>Pgt</i> -40-3  | <i>Pgt</i> -40-3  | 15,36,330  | 25.93   |
| <i>Pgt</i> -117-6 | <i>Pgt</i> -117-6 | 13,03,490  | 19.68   |

**Table S4.** Identification of inter-pathotypes genetic variations among the *P. graminis* pathotypes.

| Mapped Reads      | Reference         | Total SNPs | Heterokaryotic SNPs/Kb | Homokaryotic SNPs/Kb |
|-------------------|-------------------|------------|------------------------|----------------------|
| <i>Pgt</i> -14    | <i>Pgt</i> 40A    | 14,92,928  | 11.31                  | 1.26                 |
| <i>Pgt</i> -14    | <i>Pgt</i> 40-3   | 14,95,107  | 11.32                  | 1.28                 |
| <i>Pgt</i> -14    | <i>Pgt</i> -117-6 | 18,74,553  | 11.99                  | 5.67                 |
| <i>Pgt</i> -40A   | <i>Pgt</i> -14    | 16,31,882  | 13.11                  | 1.69                 |
| <i>Pgt</i> -40A   | <i>Pgt</i> -40-3  | 15,70,240  | 12.87                  | 1.17                 |
| <i>Pgt</i> -40A   | <i>Pgt</i> -117-6 | 19,89,425  | 13.56                  | 6.51                 |
| <i>Pgt</i> -40-3  | <i>Pgt</i> -14    | 16,45,674  | 13.20                  | 1.69                 |
| <i>Pgt</i> -40-3  | <i>Pgt</i> -40A   | 15,81,531  | 12.95                  | 1.16                 |
| <i>Pgt</i> -40-3  | <i>Pgt</i> -117-6 | 20,01,892  | 13.63                  | 6.51                 |
| <i>Pgt</i> -117-6 | <i>Pgt</i> -14    | 15,45,043  | 9.39                   | 4.64                 |
| <i>Pgt</i> -117-6 | <i>Pgt</i> -40A   | 15,62,457  | 8.99                   | 5.65                 |
| <i>Pgt</i> -117-6 | <i>Pgt</i> -40-3  | 15,65,119  | 9.00                   | 5.66                 |

**Table S5.** Gene predictions of the *P. graminis* pathotypes.

| Pathotypes                                      | <i>Pgt</i> 14 | <i>Pgt</i> 40A | <i>Pgt</i> 117-6 | <i>Pgt</i> 40-3 |
|-------------------------------------------------|---------------|----------------|------------------|-----------------|
| Genes ( $\geq 150$ bases)                       | 12424         | 11347          | 13943            | 11371           |
| Genes ( $\geq 450$ bases)                       | 9419          | 8665           | 10315            | 8694            |
| Genes with annotation                           | 9250          | 8507           | 10141            | 8547            |
| Genes with annotation (excluding Hypotheticals) | 4850          | 4558           | 5142             | 4581            |

**Table S6.** Categorization of annotated genes (> 450) into various classes based on their functional roles.

| s.no | Functional Class                                | <i>Pgt</i> 14 | <i>Pgt</i> 40-A | <i>Pgt</i> 117-6 | <i>Pgt</i> 40-3 |
|------|-------------------------------------------------|---------------|-----------------|------------------|-----------------|
|      | Amino acid biosynthesis                         | 96            | 93              | 100              | 96              |
| 2    | Biosyn. of cofactors, prosthetic grps& carriers | 124           | 114             | 124              | 113             |
| 3    | Cell envelope                                   | 90            | 82              | 84               | 84              |
| 4    | Cellular processes                              | 332           | 309             | 345              | 312             |
| 5    | Central intermediary metabolism                 | 42            | 39              | 45               | 43              |
| 6    | DNA metabolism                                  | 203           | 202             | 203              | 207             |
| 7    | Growth & development                            | 146           | 134             | 140              | 126             |
| 8    | Energy metabolism                               | 924           | 875             | 956              | 882             |
| 9    | Fatty acid & phospholipid metabolism            | 60            | 58              | 72               | 58              |
| 10   | Hypothetical proteins                           | 4400          | 3949            | 4999             | 3966            |
| 11   | Mobile &extrachromosomal element functions      | 354           | 289             | 463              | 300             |
| 12   | Protein fate                                    | 404           | 380             | 423              | 379             |
| 13   | Protein synthesis                               | 256           | 252             | 270              | 256             |
| 14   | Purines, pyrimidines, nucleosides & nucleotides | 71            | 68              | 87               | 72              |
| 15   | Regulatory functions                            | 97            | 100             | 97               | 94              |
| 16   | Signal transduction                             | 69            | 58              | 74               | 60              |
| 17   | Transcription                                   | 267           | 249             | 264              | 243             |
| 18   | Transport and binding proteins                  | 438           | 416             | 438              | 425             |
| 19   | Unclassified                                    | 136           | 130             | 152              | 123             |

|    |                   |      |      |       |      |
|----|-------------------|------|------|-------|------|
| 20 | Unknown function  | 57   | 61   | 73    | 63   |
| 21 | Conserved domains | 319  | 285  | 342   | 294  |
| 22 | Predicted Protein | 363  | 362  | 388   | 349  |
| 23 | Viral functions   | 2    | 2    | 2     | 2    |
|    | Total             | 9250 | 8507 | 10141 | 8547 |

**Table S7.** Secretome analysis of the *P. graminis* pathotypes.

| Pathotypes                      | <i>Pgt 14</i> | <i>Pgt 40A</i> | <i>Pgt 40-3</i> | <i>Pgt 117-6</i> |
|---------------------------------|---------------|----------------|-----------------|------------------|
| Total proteins                  | 12424         | 11347          | 11371           | 13934            |
| SignalP                         | 1412          | 1310           | 1308            | 1574             |
| TargetP                         | 2270          | 2065           | 2062            | 2513             |
| SignalP+TargetP merged unique   | 2299          | 2094           | 2098            | 2551             |
| TmHm 0 and 1 Tm                 | 1978          | 1770           | 1790            | 2216             |
| ProtComp Extracellular secreted | 588           | 529            | 535             | 681              |

**Table S8.** Functional Annotation of proteomes in *P. graminis* pathotypes (Against PHI Database).

| Pathotypes                 | <i>Pgt 14</i> | <i>Pgt 40-A</i> | <i>Pgt 117-6</i> | <i>Pgt 40-3</i> |
|----------------------------|---------------|-----------------|------------------|-----------------|
| Year of Isolation          | 1959          | 1974            | 1990             | 2008            |
| Genes ( $\geq 150$ bases)  | 12424         | 11347           | 13943            | 11371           |
| Annotated against PHI      | 923           | 874             | 945              | 886             |
| % Genes annotated with PHI | 7.42          | 7.70            | 6.77             | 7.79            |

**Table S9.** Analysis of pairwise orthologous genes across the *P. graminis* pathotypes.

| Orthologous pairs among the pathotypes                 |  |      |             |      |       |
|--------------------------------------------------------|--|------|-------------|------|-------|
| Cluster                                                |  |      | Ortho-Pairs |      |       |
| Pgt 14-Pgt1176                                         |  |      | 642         |      |       |
| Pgt 403-Pgt 40A                                        |  |      | 353         |      |       |
| Pgt 14-Pgt 40-3                                        |  |      | 160         |      |       |
| P.gr 14- Pgt 40A                                       |  |      | 146         |      |       |
| Pgt 1176- Pgt 40A                                      |  |      | 127         |      |       |
| Pgt 403- Pgt 1176                                      |  |      | 122         |      |       |
| Pgt 14- Pgt 403- Pgt 1176                              |  |      | 308         |      |       |
| Pgt 14- Pgt 40A- Pgt 1176                              |  |      | 271         |      |       |
| Pgt 403- Pgt 40A- Pgt 1176                             |  |      | 234         |      |       |
| Pgt 403- Pgt 40A- Pgt 14                               |  |      | 622         |      |       |
| Pgt 40A- Pgt 14- Pgt 403- Pgt 1176                     |  |      | 7106        |      |       |
| Specificity and unique features of the four pathotypes |  |      |             |      |       |
| P. graminis pathotypes                                 |  | 14   | 40A         | 40-3 | 117-6 |
| Genes having orthologs (across species)                |  | 8580 | 8072        | 8126 | 8340  |
| Pure paralogous genes with no orthologs across species |  | 9    | 0           | 1    | 93    |
| Genes with neither ortho- nor paralogs                 |  | 830  | 593         | 567  | 1882  |

**Table S10.** Diversifying selection analysis of genes ( $\geq 450$ bp) in four *P. graminis* pathotypes.

| Genome           | Genes ( $\geq 450$ bp) | Genes analyzed by YN00 | Mean <i>dN/dS</i> ratio | Genes analyzed by CODEML |
|------------------|------------------------|------------------------|-------------------------|--------------------------|
| <i>Pgt 117-6</i> | 10315                  | 8340 (80.85%)          | 0.32                    | 415 (4.02%)              |
| <i>Pgt 14</i>    | 9419                   | 8580 (91.09%)          | 0.28                    | 440 (4.67%)              |
| <i>Pgt 40-3</i>  | 8694                   | 8072 (92.85%)          | 0.28                    | 430 (4.95%)              |
| <i>Pgt 40A</i>   | 8665                   | 8126 (93.78%)          | 0.28                    | 435 (5.02%)              |

**Table S11.** Genes under specific selection pressure in the *P. graminis* pathotypes.

| Genome           | YN00 based Analysis           |                               |                               | CODEML<br>(Site-specific diversifying genes)<br>( $P < 0.05$ ) |                                       |
|------------------|-------------------------------|-------------------------------|-------------------------------|----------------------------------------------------------------|---------------------------------------|
|                  | Genes with<br>( $dN/dS$ ) = 1 | Genes with<br>( $dN/dS$ ) < 1 | Genes with<br>( $dN/dS$ ) > 1 | Purifying Selection<br>( $dN/dS$ ) < 1                         | Positive Selection<br>( $dN/dS$ ) > 1 |
| <i>Pgt</i> 117-6 | 1                             | 8073<br>(96.80%)              | 266 (3.19%)                   | 155 (37.35%)                                                   | 119 (28.67%)                          |
| <i>Pgt</i> 14    | 0                             | 8336<br>(97.16%)              | 244 (2.84%)                   | 148 (33.64%)                                                   | 137 (31.14%)                          |
| <i>Pgt</i> 40-A  | 1                             | 7841<br>(97.14%)              | 230 (2.85%)                   | 155 (36.05%)                                                   | 125 (29.07%)                          |
| <i>Pgt</i> 40-3  | 0                             | 7887<br>(97.06%)              | 239 (2.94%)                   | 150 (34.48%)                                                   | 132 (30.34 %)                         |

**Table S12.** Functional classification of genes with omega ( $dN/dS$ ) > 1.

| s.no | Functional Class                                | <i>Pgt</i> 117-6 | <i>Pgt</i> 14 | <i>Pgt</i> 40A | <i>Pgt</i> 40-3 |
|------|-------------------------------------------------|------------------|---------------|----------------|-----------------|
| 1    | Amino acid biosynthesis                         | 3                | 1             | 0              | 1               |
| 2    | Biosyn. of cofactors, prosthetic grps& carriers | 1                | 1             | 0              | 0               |
| 3    | Cell envelope                                   | 0                | 0             | 0              | 0               |
| 4    | Cellular processes                              | 4                | 6             | 3              | 5               |
| 5    | Central intermediary metabolism                 | 1                | 1             | 1              | 2               |
| 6    | DNA metabolism                                  | 1                | 0             | 1              | 0               |
| 7    | Growth & development                            | 0                | 2             | 1              | 2               |
| 8    | Energy metabolism                               | 8                | 8             | 11             | 7               |
| 9    | Fatty acid & phospholipid metabolism            | 0                | 0             | 0              | 0               |
| 10   | Hypothetical proteins                           | 202              | 184           | 174            | 179             |
| 11   | Mobile &extrachromosomal element functions      | 10               | 7             | 7              | 5               |
| 12   | Protein fate                                    | 6                | 6             | 4              | 6               |
| 13   | Protein synthesis                               | 2                | 3             | 3              | 2               |
| 14   | Purines, pyrimidines, nucleosides & nucleotides | 0                | 0             | 1              | 0               |
| 15   | Regulatory functions                            | 1                | 1             | 2              | 1               |
| 16   | Signal transduction                             | 0                | 0             | 1              | 1               |
| 17   | Transcription                                   | 0                | 0             | 1              | 2               |
| 18   | Transport and binding proteins                  | 5                | 1             | 2              | 5               |
| 19   | Unclassified                                    | 2                | 3             | 2              | 1               |
| 20   | Unknown function                                | 0                | 3             | 2              | 2               |
| 21   | Conserved domains                               | 4                | 6             | 4              | 4               |
| 22   | Predicted Protein                               | 9                | 3             | 3              | 5               |
| 23   | Viral functions                                 | 0                | 0             | 0              | 0               |
| 24   | Un-annotated                                    | 8                | 8             | 8              | 9               |
|      | Total                                           | 267              | 244           | 231            | 239             |



**Table S13.** Functional classification of Site-specific diversifying genes.

| s.no | Functional Class                                 | Pgt 117-6 | Pgt 14 | Pgt 40-A | Pgt 40-3 |
|------|--------------------------------------------------|-----------|--------|----------|----------|
| 1    | Amino acid biosynthesis                          | 3         | 1      | 0        | 1        |
| 2    | Biosyn. of cofactors, prosthetic grps & carriers | 1         | 1      | 0        | 0        |
| 3    | Cell envelope                                    | 0         | 0      | 0        | 0        |
| 4    | Cellular processes                               | 2         | 5      | 1        | 5        |
| 5    | Central intermediary metabolism                  | 0         | 0      | 0        | 2        |
| 6    | DNA metabolism                                   | 0         | 0      | 1        | 0        |
| 7    | Growth & development                             | 0         | 1      | 1        | 2        |
| 8    | Energy metabolism                                | 4         | 5      | 9        | 4        |
| 9    | Fatty acid & phospholipid metabolism             | 0         | 0      | 0        | 0        |
| 10   | Hypothetical proteins                            | 83        | 100    | 86       | 91       |
| 11   | Mobile & extrachromosomal element functions      | 5         | 4      | 5        | 4        |
| 12   | Protein fate                                     | 1         | 4      | 3        | 3        |
| 13   | Protein synthesis                                | 1         | 2      | 1        | 0        |
| 14   | Purines, pyrimidines, nucleosides & nucleotides  | 0         | 0      | 1        | 0        |
| 15   | Regulatory functions                             | 1         | 1      | 2        | 1        |
| 16   | Signal transduction                              | 0         | 0      | 1        | 1        |
| 17   | Transcription                                    | 0         | 0      | 1        | 1        |
| 18   | Transport and binding proteins                   | 4         | 0      | 2        | 3        |
| 19   | Unclassified                                     | 2         | 2      | 2        | 1        |
| 20   | Unknown function                                 | 0         | 2      | 2        | 1        |
| 21   | Conserved domains                                | 3         | 4      | 2        | 4        |
| 22   | Predicted Protein                                | 4         | 3      | 2        | 4        |
| 23   | Viral functions                                  | 0         | 0      | 0        | 0        |
|      | Un-annotated                                     | 5         | 2      | 3        | 4        |
|      | Total                                            | 119       | 137    | 125      | 132      |

**Table S14.** Virulence /avirulence formula for the *P. graminis* pathotypes.

| Pgt pathotypes | Avirulence genes                                                                                                                                                                                          | Virulence genes                                                                                                                                                                                                                     |
|----------------|-----------------------------------------------------------------------------------------------------------------------------------------------------------------------------------------------------------|-------------------------------------------------------------------------------------------------------------------------------------------------------------------------------------------------------------------------------------|
| <b>14</b>      | <i>Sr 5, Sr 7a, Sr 9b, Sr 9e, Sr11, Sr 13, Sr 17, Sr 22, Sr 23, Sr 24, Sr 25, Sr 26, Sr 27, Sr 28, Sr 29, Sr 30, Sr 31, Sr 32, Sr 33, Sr 34, Sr 35, Sr 36, Sr 37, Sr 39, Sr 40, Sr 43, Sr Tmp, Sr Tt3</i> | <i>Sr 2, Sr6, Sr7b, Sr 8a, Sr 8b, Sr 9a, Sr 9d, Sr 9f, Sr 9g, Sr 10, Sr 14, Sr 15, Sr 16, Sr 18, Sr 19, Sr 20, Sr 21, Sr McN</i>                                                                                                    |
| <b>40A</b>     | <i>Sr 7a, Sr 13, Sr 21, Sr 22, Sr24, Sr 25, Sr 26, Sr 27, Sr 30, Sr 31, Sr 32, Sr 33, Sr 35, Sr 36, Sr 37, Sr 39, Sr 40, Sr 43, Sr Tmp, Sr Tt3</i>                                                        | <i>Sr 2, Sr 5, Sr6, Sr7b, Sr 8a, Sr 8b, Sr 9a, Sr 9b, Sr 9d, Sr 9e, Sr 9f, Sr 9g, Sr 10, Sr 14, Sr 15, Sr 16, Sr 17, Sr 18, Sr 19, Sr 20, Sr 23, Sr 28, Sr 29, Sr 34, Sr McN</i>                                                    |
| <b>40-3</b>    | <i>Sr 21, Sr 22, Sr24, Sr 25, Sr 26, Sr 27, Sr 31, Sr 32, Sr 33, Sr 35, Sr 36, Sr 37, Sr 39, Sr 40, Sr 42, Sr 43, Sr Tmp, Sr Tt3</i>                                                                      | <i>Sr 2, Sr 5, Sr 6, Sr 7a, Sr 7b, Sr 8a, Sr 8b, Sr 9a, Sr 9b, Sr 9d, Sr 9e, Sr 9f, Sr 9g, Sr 10, Sr 11, Sr 13, Sr 14, Sr 15, Sr 16, Sr 17, Sr 18, Sr 19, Sr 20, Sr 23, Sr 28, Sr 29, Sr 30, Sr 34, Sr 38, Sr 44, Sr McN, Sr Gt</i> |
| <b>117-6</b>   | <i>Sr5, Sr 7a, Sr8a, Sr8b, Sr9b, Sr11, Sr 12, Sr22, Sr24, Sr 25, Sr 26, Sr 27, Sr 28, Sr 30, Sr 31, Sr 32, Sr 33, Sr 35, Sr 36, Sr 12, Sr 13, Sr 14, Sr 15, Sr 16, Sr 17, Sr 19, Sr 21, Sr 37, Sr Tmp</i> | <i>Sr 2, Sr 6, Sr 7a, Sr 7b, Sr 9e, Sr 9f, Sr 9g, Sr 10, Sr 11, Sr 23, Sr 29, Sr 34, Sr McN</i>                                                                                                                                     |

**Table S15.** wheat lines/variety of wheat carrying *Sr* genes.

| Set 0 (Near isogenic wheat lines/variety)  | Set A (Near isogenic wheat lines/variety)  | Set B (wheat Variety)                   |
|--------------------------------------------|--------------------------------------------|-----------------------------------------|
| <i>Sr24</i> (3D/Ag Translocations)         | <i>Sr13</i> (Khapstein/10 Marquis)         | Marquis ( <i>Sr7b+Sr18+Sr19+Sr20</i> )  |
| NI 5439 ( <i>Sr11</i> )                    | <i>Sr9b</i> (CS/KF 2B)                     | Einkorn ( <i>Sr21</i> )                 |
| <i>Sr25</i> (7D/Ag translocations)         | <i>Sr11</i> (IS <i>Sr11</i> Ra= W 3015)    | Kota ( <i>Sr28+ Sr7b</i> )              |
| DWR195( <i>Sr2+Sr31</i> )                  | <i>Sr28</i> {Kota ; = <i>Sr28</i> (CH 71)} | Reliance ( <i>Sr5+ Sr16+Sr18+Sr20</i> ) |
| HD2189( <i>Sr2+Sr31</i> )                  | <i>Sr8b</i> (IS <i>Sr8a</i> Ra = W3384)    | Charter ( <i>Sr11+</i> )                |
| LoK 1( <i>Sr2+Sr9b+Sr11</i> )              | <i>Sr9e</i> (Vernstein)                    | Khapli ( <i>Sr7a, Sr13, Sr14</i> )      |
| HI1077( <i>Sr2+Sr9b+Sr11</i> )             | <i>Sr30</i> (Festiguay)                    | Tc*6/ <i>Sr31/Lr26(Yr9)</i>             |
| Barley Local (Susceptible barley check)    | <i>Sr37</i> (Line W)                       | --                                      |
| Agra Local (Susceptible bread wheat check) | --                                         | --                                      |

**Table S16.** Segmental Duplication in *P. graminis* genomes.

| <i>Pgt</i> Pathotypes      | 14    | 40A   | 117-6 | 40-3  |
|----------------------------|-------|-------|-------|-------|
| Assembled Genome Size (Mb) | 63.31 | 59.15 | 66.25 | 59.25 |
| Segmental Duplication (Mb) | 0.38  | 0.26  | 0.76  | 0.24  |
| SDs % in Genome            | 0.60  | 0.44  | 1.14  | 0.40  |
| SDs (≥95% Identity) (Mb)   | 0.023 | 0.012 | 0.091 | 0.014 |
